# Supplementary material for: Criticality supports cross-frequency cortical-thalamic information transfer during conscious states
Source: eLife journal article supplement (doi:10.7554/elife.86547), 2023-12-15
Supplement: supp [file elife-86547-supp-v1.zip]

This table presents a side-by-side comparison of the results obtained from our cross-frequency information transfer analysis using 100 and 250 surrogate datasets. Each row corresponds to a selected 10-second trial during the conscious state for each patient/animal. The selection criteria for these trials were as follows: we identified a trial in which the initial analysis (using 100 surrogates) showed statistically significant cross-frequency information transfer in both directions, i.e. from both cortex (“cort”) to thalamus (“thal”) and from thalamus to cortex. In a majority of subjects, this occurred for a large portion of available trials, and so we randomly selected among those a single trial to evaluate with the larger number of surrogates. In instances where no trials showed significant bidirectional communication, we selected the trial which had the lowest combined p-value (sum of the p-value for cortico-thalamic communication and the p-value for thalamo-cortical communication). The table illustrates that our conclusions hold consistent when the number of surrogates was increased to 250, thereby reinforcing the robustness of our original findings.

|                     | 100 Surrogates |              | 250 Surrogates |              |
|---------------------|----------------|--------------|----------------|--------------|
|                     | Cort to thal   | Thal to cort | Cort to thal   | Thal to cort |
| Human ET Patient 1  | p=0            | p=0          | p=0            | p=0          |
| Human ET Patient 2  | p=0            | p=0          | p=0            | p=0          |
| Human ET Patient 3  | p=0            | p=0          | p=0            | p=0          |
| Human ET Patient 4  | p=0            | p=0          | p=0            | p=0          |
| Human ET Patient 5  | p=0            | p=0          | p=0            | p=0          |
| Human ET Patient 6  | p=0            | p=0          | p=0            | p=0          |
| Human ET Patient 7  | p=0            | p=0          | p=0            | p=0          |
| Human ET Patient 8  | p=0            | p=0          | p=0            | p=0          |
| Human ET Patient 9  | p=0            | p=0          | p=0            | p=0          |
| Human ET Patient 10 | p=0            | p=0          | p=0            | p=0          |
| Long-Evans Rat 1    | p=0.01         | p=0.04       | p=0.016        | p=0.02       |
| Long-Evans Rat 2    | p=0.03         | p=0.04       | p=0.028        | p=0.036      |
| Long-Evans Rat 3    | p=0.01         | p=0.02       | p=0.036        | p=0.004      |
| Long-Evans Rat 4    | p=0            | p=0.02       | p=0            | p=0.004      |
| Long-Evans Rat 5    | p=0.02         | p=0.02       | p=0.02         | p=0.016      |
| Long-Evans Rat 6    | p=0.03         | p=0.02       | p=0.012        | p=0.024      |
| Long-Evans Rat 7    | p=0.14         | p=0.03       | p=0.136        | p=0.004      |
| Long-Evans Rat 8    | p=0.01         | p=0.024      | p=0.04         | p=0.04       |
| Long-Evans Rat 9    | p=0.07         | p=0.16       | p=0.04         | p=0.14       |
| GAERS Rat 1         | p=0            | p=0.02       | p=0.004        | p=0.004      |
| GAERS Rat 2         | p=0.03         | p=0          | p=0.052        | p=0.008      |
| GAERS Rat 3         | p=0.01         | p=0          | p=0.004        | p=0          |
| GAERS Rat 4         | p=0            | p=0          | p=0            | p=0.01       |
| GAERS Rat 5         | p=0.01         | p=0.03       | p=0.012        | p=0.028      |
| GAERS Rat 6         | p=0            | p=0.03       | p=0.008        | p=0.044      |
| GAERS Rat 7         | p=0            | p=0.01       | p=0.008        | p=0.028      |
| C58/BL6 Mouse 1     | p=0.03         | p=0.01       | p=0.008        | p=0.012      |
| C58/BL6 Mouse 2     | p=0.02         | p=0          | p=0.008        | p=0          |
| C58/BL6 Mouse 3     | p=0            | p=0.03       | p=0.004        | p=0.008      |
| C58/BL6 Mouse 4     | p=0            | p=0          | p=0.012        | p=0.004      |
| C58/BL6 Mouse 5     | p=0.02         | p=0          | p=0.036        | p=0.02       |
