# Supplementary material for: Criticality supports cross-frequency cortical-thalamic information transfer during conscious states
Source: eLife journal article supplement (doi:10.7554/elife.86547), 2023-12-15
Supplement: supp [file elife-86547-supp-v1.zip]

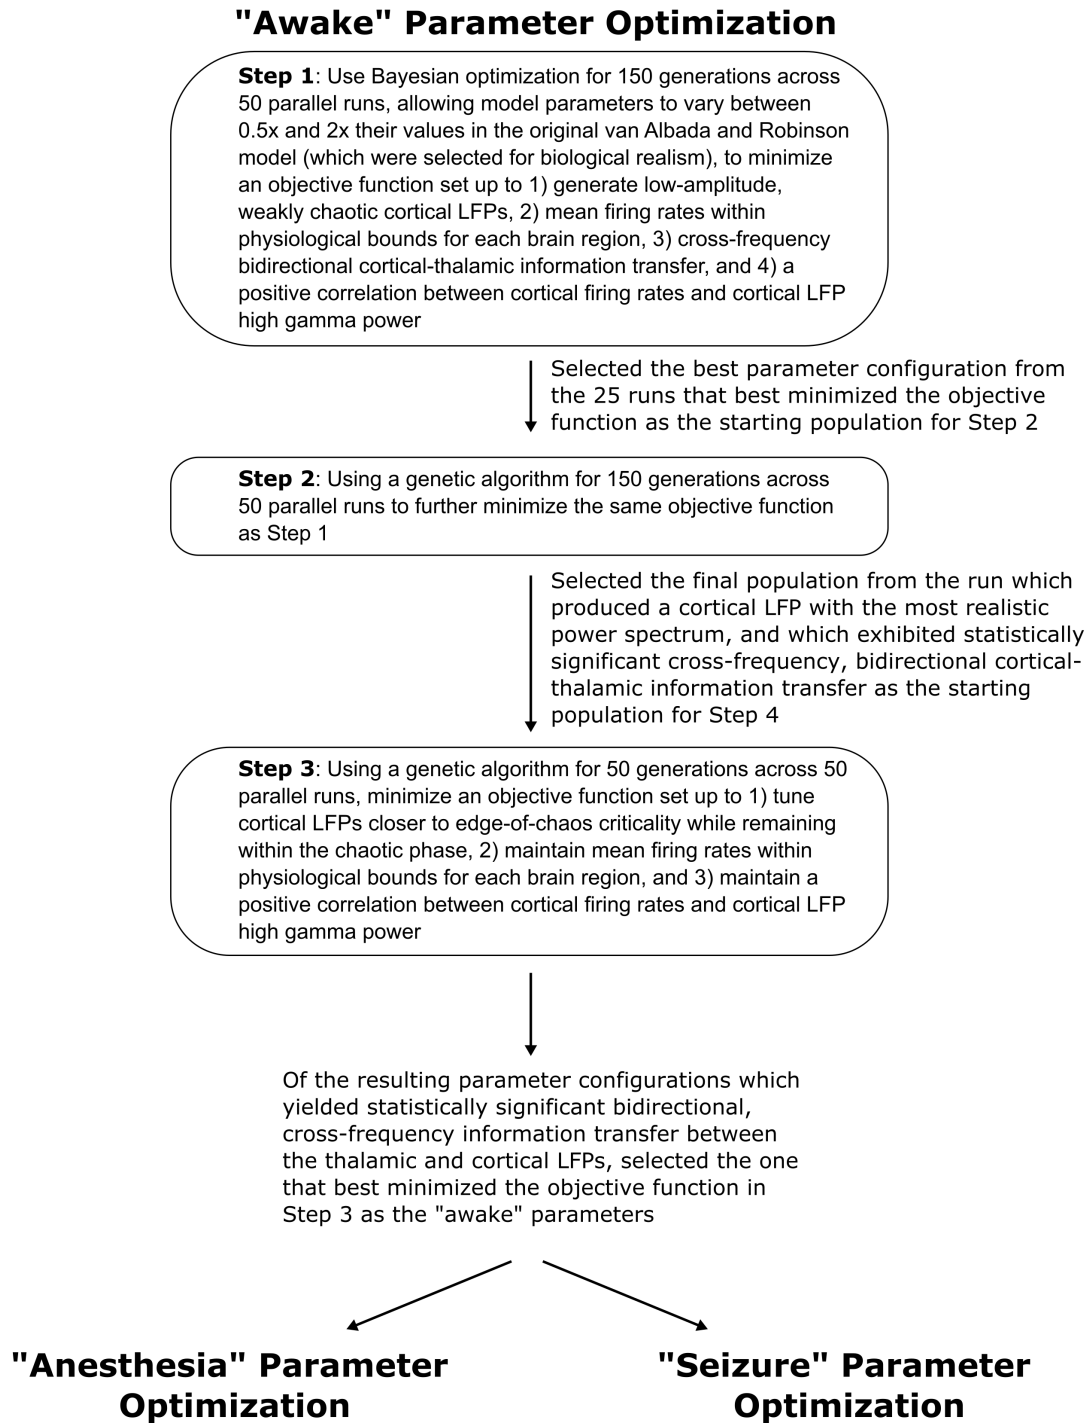

Fig. 6-figure supplement 1: We here depict the workflow for the use of Bayesian-genetic optimization to derive model parameters for the awake state of the mean-field model of the electrodynamics of the basal ganglia-thalamo-cortical system.
