# Supplementary material for: Criticality supports cross-frequency cortical-thalamic information transfer during conscious states
Source: eLife journal article supplement (doi:10.7554/elife.86547), 2023-12-15
Supplement: supp [file elife-86547-supp-v1.zip]

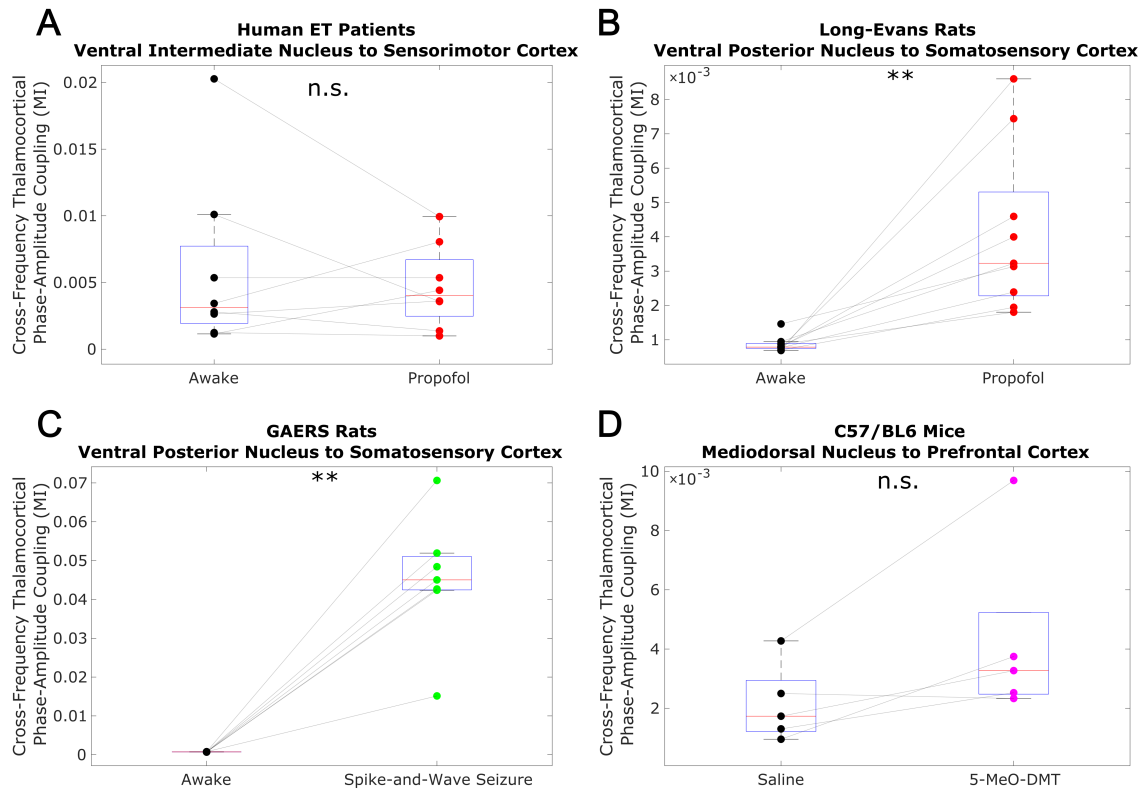

Fig. 5-figure supplement 2: We analyzed cross-frequency phase-amplitude coupling from thalamus to cortex using the same methods described in Fig. 1-figure supplement 2, and again observed no consistent relationship between cross-frequency thalamocortical phase-amplitude coupling and consciousness. \* $p < 0.05$ , \*\* $p < 0.01$ , \*\*\* $p < 0.001$ , significance assessed using a one-tailed Wilcoxon signed-rank test.
