# Supplementary material for: Criticality supports cross-frequency cortical-thalamic information transfer during conscious states
Source: eLife journal article supplement (doi:10.7554/elife.86547), 2023-12-15
Supplement: supp [file elife-86547-supp-v1.zip]

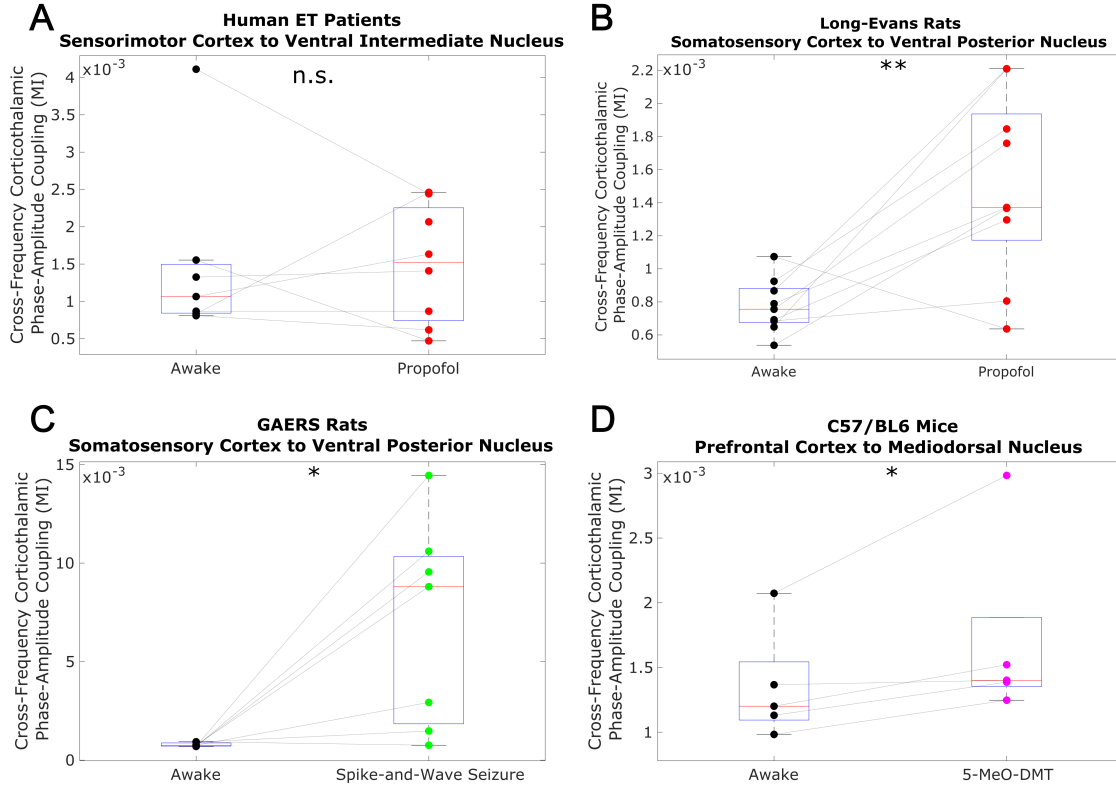

Fig. 3-figure supplement 2: We evaluated cross-frequency phase-amplitude coupling from cortex to thalamus using the modulation index (MI). Specifically, we evaluated coupling between the phase of the low-frequency (1-13 Hz) activity and the amplitude of high-frequency (52-104 Hz) activity (matching the frequency ranges analyzed in the main body of our paper). Note that the MI is a bivariate measure, meaning that it is calculated between pairs of univariate channels. As such, for our human ET patient data, which consisted of multiple cortical and thalamic channels, we calculated the MI from all cortical channels to all thalamic channels, and set the corticothalamic MI as the median across all resulting values. As was the case with transfer entropy, we found no consistent relationship between cross-frequency corticothalamic phase-amplitude coupling (across the frequencies studied in this paper) and consciousness. \* $p < 0.05$ , \*\* $p < 0.01$ , \*\*\* $p < 0.001$ , significance assessed using a one-tailed Wilcoxon signed-rank test.
