# Supplementary material for: Criticality supports cross-frequency cortical-thalamic information transfer during conscious states
Source: eLife journal article supplement (doi:10.7554/elife.86547), 2023-12-15
Supplement: supp [file elife-86547-supp-v1.zip]

Table 1: Connectivity parameters for the waking state of the mean-field model of the basal ganglia-thalamo-cortical system, derived using Bayesian-genetic optimization.

|                                            | <b>Axonal range (r)</b> | <b>Damping rate (<math>\gamma</math>)</b> | <b>Synapto-dendritic Decay Rate (<math>\alpha</math>)</b> | <b>Synapto-dendritic Rise Rate (<math>\beta</math>)</b> | <b>Axonal delay (<math>\tau</math>)</b> | <b>Connection strength</b> |
|--------------------------------------------|-------------------------|-------------------------------------------|-----------------------------------------------------------|---------------------------------------------------------|-----------------------------------------|----------------------------|
| <b>Exc. <math>\rightarrow</math> Exc.</b>  | 0.12278                 | 220.0791                                  | 85.9279                                                   | 322                                                     | 0.0062323                               | 0.0018327                  |
| <b>Inh. <math>\rightarrow</math> Exc.</b>  |                         |                                           | 42.555                                                    | 281                                                     | 0.04334                                 | -0.0013089                 |
| <b>Relay <math>\rightarrow</math> Exc.</b> |                         |                                           | 220.8828                                                  | 193                                                     | 0.028104                                | 0.00071992                 |
| <b>Exc. <math>\rightarrow</math> Inh.</b>  | 0.22666                 | 232.1854                                  | 85.7514                                                   | 175.0493                                                | 0.00037033                              | 0.0011322                  |
| <b>Inh. <math>\rightarrow</math> Inh.</b>  |                         |                                           | 113.6299                                                  | 620                                                     | 0.033074                                | -0.00050632                |
| <b>Relay <math>\rightarrow</math> Inh.</b> |                         |                                           | 129.4099                                                  | 555                                                     | 0.025181                                | 0.0003415                  |
| <b>GPe <math>\rightarrow</math> Inh.</b>   |                         |                                           | 75.6795                                                   | 205.7867                                                | 0.034081                                | -0.0000168                 |
| <b>Exc. <math>\rightarrow</math> TRN</b>   | 0.17182                 | 73                                        | 45.089                                                    | 492                                                     | 0.036522                                | 0.00029379                 |
| <b>Relay <math>\rightarrow</math> TRN</b>  |                         |                                           | 187                                                       | 791                                                     | 0.0022316                               | 0.0000157                  |
| <b>GPe <math>\rightarrow</math> TRN</b>    |                         |                                           | 159.0547                                                  | 153.6758                                                | 0.047298                                | -0.00032958                |
| <b>Exc. <math>\rightarrow</math> Relay</b> | 0.218                   | 137.9915                                  | 44.8479                                                   | 483.8873                                                | 0.022911                                | 0.00048973                 |
| <b>TRN <math>\rightarrow</math> Relay</b>  |                         |                                           | 182                                                       | 129.5577                                                | 0.0017706                               | -0.00033052                |
| <b>GPi <math>\rightarrow</math> Relay</b>  |                         |                                           | 162.841                                                   | 347.9839                                                | 0.0014159                               | -0.000024                  |
| <b>GPe <math>\rightarrow</math> Relay</b>  |                         |                                           | 63.8256                                                   | 914.7857                                                | 0.0090983                               | -0.0002165                 |
| <b>Exc. <math>\rightarrow</math> D1</b>    | 0.1188                  | 23                                        | 152.7024                                                  | 258                                                     | 0.00069557                              | 0.00080197                 |
| <b>Relay <math>\rightarrow</math> D1</b>   |                         |                                           | 143.3016                                                  | 521.6289                                                | 0.0015367                               | 0.0000963                  |
| <b>D1 <math>\rightarrow</math> D1</b>      |                         |                                           | 122                                                       | 262.8843                                                | 0.002218                                | -0.0001518                 |
| <b>GPe <math>\rightarrow</math> D1</b>     |                         |                                           | 78.6903                                                   | 270.8312                                                | 0.03725                                 | -0.0000887                 |
| <b>Exc. <math>\rightarrow</math> D2</b>    | 0.071609                | 143                                       | 125                                                       | 597.8874                                                | 0.00069498                              | 0.00071134                 |
| <b>Relay <math>\rightarrow</math> D2</b>   |                         |                                           | 53.1836                                                   | 390                                                     | 0.002088                                | 0.0000248                  |
| <b>D2 <math>\rightarrow</math> D2</b>      |                         |                                           | 74.6389                                                   | 435.8297                                                | 0.029915                                | -0.00024613                |
| <b>GPe <math>\rightarrow</math> D2</b>     |                         |                                           | 67.8765                                                   | 294.734                                                 | 0.045457                                | -0.00045438                |
| <b>D1 <math>\rightarrow</math> GPi</b>     |                         |                                           | 116.0711                                                  | 630.4158                                                | 0.0012356                               | -0.0000831                 |
| <b>GPe <math>\rightarrow</math> GPi</b>    |                         |                                           | 148.6143                                                  | 403.3654                                                | 0.0006374                               | -0.0000316                 |
| <b>STN <math>\rightarrow</math> GPi</b>    |                         |                                           | 51.749                                                    | 255.38                                                  | 0.001192                                | 0.00018528                 |
| <b>D2 <math>\rightarrow</math> GPe</b>     |                         |                                           | 23.4433                                                   | 311                                                     | 0.00061974                              | -0.00021758                |
| <b>GPe <math>\rightarrow</math> GPe</b>    |                         |                                           | 79.2077                                                   | 367.7875                                                | 0.0027569                               | -0.00010213                |
| <b>STN <math>\rightarrow</math> GPe</b>    |                         |                                           | 127.4022                                                  | 483.2848                                                | 0.00043817                              | 0.00023124                 |
| <b>Exc. <math>\rightarrow</math> STN</b>   | 0.086406                | 95                                        | 136                                                       | 730                                                     | 0.00074221                              | 0.00010993                 |
| <b>GPe <math>\rightarrow</math> STN</b>    |                         |                                           | 118.5557                                                  | 314                                                     | 0.00059721                              | -0.0000276                 |

Table 2: Population parameters for the waking state of the mean-field model of the basal ganglia-thalamo-cortical system, derived using Bayesian-genetic optimization.

|                            | <b>Maximum firing rate (Q)</b> | <b>Firing threshold (<math>\theta</math>)</b> | <b>Firing threshold spread (<math>\sigma</math>)</b> |
|----------------------------|--------------------------------|-----------------------------------------------|------------------------------------------------------|
| <b>Cortex (excitatory)</b> | 228.0316                       | 0.029706                                      | 0.0012552                                            |
| <b>Cortex (inhibitory)</b> | 249                            | 0.011629                                      | 0.0045276                                            |
| <b>TRN</b>                 | 751.9918                       | 0.0013855                                     | 0.0029211                                            |
| <b>Relay</b>               | 466                            | 0.0034528                                     | 0.0043363                                            |
| <b>D1</b>                  | 97.0027                        | 0.0056627                                     | 0.0039531                                            |
| <b>D2</b>                  | 13.5585                        | 0.0084425                                     | 0.0031499                                            |
| <b>GPI</b>                 | 222.0355                       | 0.0036668                                     | 0.0045221                                            |
| <b>GPe</b>                 | 202.0382                       | 0.0047459                                     | 0.0027718                                            |
| <b>STN</b>                 | 255.7239                       | 0.011212                                      | 0.0041919                                            |

Table 3: Connectivity parameters for the anesthesia state of the mean-field model of the basal ganglia-thalamo-cortical system, derived using genetic optimization.

|                                            | <b>Axonal range (r)</b> | <b>Damping rate (<math>\gamma</math>)</b> | <b>Synapto-dendritic Decay Rate (<math>\alpha</math>)</b> | <b>Synapto-dendritic Rise Rate (<math>\beta</math>)</b> | <b>Axonal delay (<math>\tau</math>)</b> | <b>Connection strength</b> |
|--------------------------------------------|-------------------------|-------------------------------------------|-----------------------------------------------------------|---------------------------------------------------------|-----------------------------------------|----------------------------|
| <b>Exc. <math>\rightarrow</math> Exc.</b>  | 0.13371                 | 365.323                                   | 153.1084                                                  | 140.2695                                                | 0.0077477                               | 0.001194                   |
| <b>Inh. <math>\rightarrow</math> Exc.</b>  |                         |                                           | 42.555                                                    | 150.1111                                                | 0.060006                                | -0.0015235                 |
| <b>Relay <math>\rightarrow</math> Exc.</b> |                         |                                           | 111.9569                                                  | 223.3302                                                | 0.029002                                | 0.00030845                 |
| <b>Exc. <math>\rightarrow</math> Inh.</b>  | 0.24992                 | 284.4327                                  | 134.7121                                                  | 175.0493                                                | 0.00037033                              | 0.0011322                  |
| <b>Inh. <math>\rightarrow</math> Inh.</b>  |                         |                                           | 115.707                                                   | 901.3049                                                | 0.033074                                | -0.00050632                |
| <b>Relay <math>\rightarrow</math> Inh.</b> |                         |                                           | 129.4099                                                  | 512.0002                                                | 0.036616                                | 0.00030238                 |
| <b>GPe <math>\rightarrow</math> Inh.</b>   |                         |                                           | 121.6404                                                  | 205.7867                                                | 0.043839                                | -1.68E-05                  |
| <b>Exc. <math>\rightarrow</math> TRN</b>   | 0.17182                 | 73                                        | 45.8769                                                   | 466.2431                                                | 0.015442                                | 0.00015174                 |
| <b>Relay <math>\rightarrow</math> TRN</b>  |                         |                                           | 41.5367                                                   | 414.209                                                 | 0.0012636                               | 1.57E-05                   |
| <b>GPe <math>\rightarrow</math> TRN</b>    |                         |                                           | 312.1321                                                  | 1146.8432                                               | 0.037738                                | -0.00032958                |
| <b>Exc. <math>\rightarrow</math> Relay</b> | 0.14701                 | 137.9915                                  | 42.8395                                                   | 317.922                                                 | 0.012198                                | 0.00039605                 |
| <b>TRN <math>\rightarrow</math> Relay</b>  |                         |                                           | 36.5624                                                   | 363.0627                                                | 0.00085722                              | -0.00033052                |
| <b>GPI <math>\rightarrow</math> Relay</b>  |                         |                                           | 186.0943                                                  | 158.6022                                                | 0.0014159                               | -2.40E-05                  |
| <b>GPe <math>\rightarrow</math> Relay</b>  |                         |                                           | 162.841                                                   | 347.9839                                                | 0.0090983                               | -0.0002165                 |
| <b>Exc. <math>\rightarrow</math> D1</b>    | 0.1188                  | 17.0626                                   | 190.1072                                                  | 131.2923                                                | 0.00069557                              | 0.00078156                 |
| <b>Relay <math>\rightarrow</math> D1</b>   |                         |                                           | 54.443                                                    | 166.2305                                                | 0.0014043                               | 0.00010744                 |
| <b>D1 <math>\rightarrow</math> D1</b>      |                         |                                           | 66.048                                                    | 773.6346                                                | 0.002218                                | -0.00013107                |
| <b>GPe <math>\rightarrow</math> D1</b>     |                         |                                           | 130.4614                                                  | 305.148                                                 | 0.03725                                 | -6.46E-05                  |
| <b>Exc. <math>\rightarrow</math> D2</b>    | 0.071609                | 130.8712                                  | 53.4017                                                   | 1381.7241                                               | 0.00069498                              | 0.00071134                 |
| <b>Relay <math>\rightarrow</math> D2</b>   |                         |                                           | 67.268                                                    | 829.9581                                                | 0.0017657                               | 2.48E-05                   |
| <b>D2 <math>\rightarrow</math> D2</b>      |                         |                                           | 72.0903                                                   | 390                                                     | 0.029915                                | -0.00039284                |
| <b>GPe <math>\rightarrow</math> D2</b>     |                         |                                           | 135.9065                                                  | 665.8283                                                | 0.045457                                | -0.00036314                |
| <b>D1 <math>\rightarrow</math> GPI</b>     |                         |                                           | 14.8752                                                   | 725                                                     | 0.0005457                               | -8.31E-05                  |
| <b>GPe <math>\rightarrow</math> GPI</b>    |                         |                                           | 54.7637                                                   | 630.4158                                                | 0.00080621                              | -2.53E-05                  |
| <b>STN <math>\rightarrow</math> GPI</b>    |                         |                                           | 162.144                                                   | 403.3654                                                | 0.0019464                               | 5.48E-05                   |
| <b>D2 <math>\rightarrow</math> GPe</b>     |                         |                                           | 37                                                        | 710                                                     | 0.00040424                              | -0.00028375                |
| <b>GPe <math>\rightarrow</math> GPe</b>    |                         |                                           | 23.4433                                                   | 153.0925                                                | 0.0014851                               | -0.00022676                |
| <b>STN <math>\rightarrow</math> GPe</b>    |                         |                                           | 185.906                                                   | 549.1626                                                | 0.00043817                              | 0.00025348                 |
| <b>Exc. <math>\rightarrow</math> STN</b>   | 0.021519                | 52.1657                                   | 112.8993                                                  | 659                                                     | 0.0010297                               | 0.0001557                  |
| <b>GPe <math>\rightarrow</math> STN</b>    |                         |                                           | 67.564                                                    | 730                                                     | 0.00053249                              | -2.76E-05                  |

Table 4: Population parameters for the anesthesia state of the mean-field model of the basal ganglia-thalamo-cortical system, derived using genetic optimization.

|                            | <b>Maximum firing rate (Q)</b> | <b>Firing threshold (<math>\theta</math>)</b> | <b>Firing threshold spread (<math>\sigma</math>)</b> |
|----------------------------|--------------------------------|-----------------------------------------------|------------------------------------------------------|
| <b>Cortex (excitatory)</b> | 228.0316                       | 0.054464                                      | 0.0011733                                            |
| <b>Cortex (inhibitory)</b> | 382.426                        | 0.011629                                      | 0.0021614                                            |
| <b>TRN</b>                 | 1140.8187                      | 0.0029636                                     | 0.0026014                                            |
| <b>Relay</b>               | 466                            | 0.0034528                                     | 0.0043363                                            |
| <b>D1</b>                  | 46.883                         | 0.0072807                                     | 0.0063121                                            |
| <b>D2</b>                  | 13.5585                        | 0.0084425                                     | 0.0037879                                            |
| <b>GPI</b>                 | 294.5833                       | 0.0036668                                     | 0.0056883                                            |
| <b>GPe</b>                 | 131.961                        | 0.0047459                                     | 0.0062872                                            |
| <b>STN</b>                 | 389.4177                       | 0.011212                                      | 0.0041919                                            |

Table 5: Connectivity parameters for the generalized spike-and-wave seizure state of the mean-field model of the basal ganglia-thalamo-cortical system, derived using genetic optimization.

|                                            | <b>Axonal range (r)</b> | <b>Damping rate (<math>\gamma</math>)</b> | <b>Synapto-dendritic Decay Rate (<math>\alpha</math>)</b> | <b>Synapto-dendritic Rise Rate (<math>\beta</math>)</b> | <b>Axonal delay (<math>\tau</math>)</b> | <b>Connection strength</b> |
|--------------------------------------------|-------------------------|-------------------------------------------|-----------------------------------------------------------|---------------------------------------------------------|-----------------------------------------|----------------------------|
| <b>Exc. <math>\rightarrow</math> Exc.</b>  | 0.12278                 | 220.0791                                  | 85.9279                                                   | 322                                                     | 0.0062323                               | 0.0018327                  |
| <b>Inh. <math>\rightarrow</math> Exc.</b>  |                         |                                           | 42.555                                                    | 281                                                     | 0.04334                                 | -0.0013089                 |
| <b>Relay <math>\rightarrow</math> Exc.</b> |                         |                                           | 220.8828                                                  | 193                                                     | 0.028104                                | 0.00071992                 |
| <b>Exc. <math>\rightarrow</math> Inh.</b>  | 0.22666                 | 232.1854                                  | 85.7514                                                   | 175.0493                                                | 0.00037033                              | 0.0011322                  |
| <b>Inh. <math>\rightarrow</math> Inh.</b>  |                         |                                           | 113.6299                                                  | 620                                                     | 0.033074                                | -0.00050632                |
| <b>Relay <math>\rightarrow</math> Inh.</b> |                         |                                           | 129.4099                                                  | 555                                                     | 0.025181                                | 0.0003415                  |
| <b>GPe <math>\rightarrow</math> Inh.</b>   |                         |                                           | 75.6795                                                   | 205.7867                                                | 0.034081                                | -0.0000168                 |
| <b>Exc. <math>\rightarrow</math> TRN</b>   | 0.17182                 | 73                                        | 45.089                                                    | 492                                                     | 0.036522                                | 0.00029379                 |
| <b>Relay <math>\rightarrow</math> TRN</b>  |                         |                                           | 187                                                       | 791                                                     | 0.0022316                               | 0.0000157                  |
| <b>GPe <math>\rightarrow</math> TRN</b>    |                         |                                           | 159.0547                                                  | 153.6758                                                | 0.047298                                | -0.00032958                |
| <b>Exc. <math>\rightarrow</math> Relay</b> | 0.218                   | 137.9915                                  | 44.8479                                                   | 483.8873                                                | 0.022911                                | 0.00048973                 |
| <b>TRN <math>\rightarrow</math> Relay</b>  |                         |                                           | 182                                                       | 129.5577                                                | 0.0017706                               | -0.00033052                |
| <b>GPi <math>\rightarrow</math> Relay</b>  |                         |                                           | 162.841                                                   | 347.9839                                                | 0.0014159                               | -0.000024                  |
| <b>GPe <math>\rightarrow</math> Relay</b>  |                         |                                           | 63.8256                                                   | 914.7857                                                | 0.0090983                               | -0.0002165                 |
| <b>Exc. <math>\rightarrow</math> D1</b>    | 0.1188                  | 23                                        | 152.7024                                                  | 258                                                     | 0.00069557                              | 0.00080197                 |
| <b>Relay <math>\rightarrow</math> D1</b>   |                         |                                           | 143.3016                                                  | 521.6289                                                | 0.0015367                               | 0.0000963                  |
| <b>D1 <math>\rightarrow</math> D1</b>      |                         |                                           | 122                                                       | 262.8843                                                | 0.002218                                | -0.0001518                 |
| <b>GPe <math>\rightarrow</math> D1</b>     |                         |                                           | 78.6903                                                   | 270.8312                                                | 0.03725                                 | -0.0000887                 |
| <b>Exc. <math>\rightarrow</math> D2</b>    | 0.071609                | 143                                       | 125                                                       | 597.8874                                                | 0.00069498                              | 0.00071134                 |
| <b>Relay <math>\rightarrow</math> D2</b>   |                         |                                           | 53.1836                                                   | 390                                                     | 0.002088                                | 0.0000248                  |
| <b>D2 <math>\rightarrow</math> D2</b>      |                         |                                           | 74.6389                                                   | 435.8297                                                | 0.029915                                | -0.00024613                |
| <b>GPe <math>\rightarrow</math> D2</b>     |                         |                                           | 67.8765                                                   | 294.734                                                 | 0.045457                                | -0.00045438                |
| <b>D1 <math>\rightarrow</math> GPi</b>     |                         |                                           | 116.0711                                                  | 630.4158                                                | 0.0012356                               | -0.0000831                 |
| <b>GPe <math>\rightarrow</math> GPi</b>    |                         |                                           | 148.6143                                                  | 403.3654                                                | 0.0006374                               | -0.0000316                 |
| <b>STN <math>\rightarrow</math> GPi</b>    |                         |                                           | 51.749                                                    | 255.38                                                  | 0.001192                                | 0.00018528                 |
| <b>D2 <math>\rightarrow</math> GPe</b>     |                         |                                           | 23.4433                                                   | 311                                                     | 0.00061974                              | -0.00021758                |
| <b>GPe <math>\rightarrow</math> GPe</b>    |                         |                                           | 79.2077                                                   | 367.7875                                                | 0.0027569                               | -0.00010213                |
| <b>STN <math>\rightarrow</math> GPe</b>    |                         |                                           | 127.4022                                                  | 483.2848                                                | 0.00043817                              | 0.00023124                 |
| <b>Exc. <math>\rightarrow</math> STN</b>   | 0.086406                | 95                                        | 136                                                       | 730                                                     | 0.00074221                              | 0.00010993                 |
| <b>GPe <math>\rightarrow</math> STN</b>    |                         |                                           | 118.5557                                                  | 314                                                     | 0.00059721                              | -0.0000276                 |

Table 6: Population parameters for the generalized spike-and-wave seizure state of the mean-field model of the basal ganglia-thalamo-cortical system, derived using genetic optimization.

|                            | <b>Maximum firing rate (Q)</b> | <b>Firing threshold (<math>\theta</math>)</b> | <b>Firing threshold spread (<math>\sigma</math>)</b> |
|----------------------------|--------------------------------|-----------------------------------------------|------------------------------------------------------|
| <b>Cortex (excitatory)</b> | 210.4443                       | 0.041636                                      | 0.00052695                                           |
| <b>Cortex (inhibitory)</b> | 341.408                        | 0.011629                                      | 0.0045276                                            |
| <b>TRN</b>                 | 841.0487                       | 0.0020067                                     | 0.0029211                                            |
| <b>Relay</b>               | 829.0906                       | 0.0033459                                     | 0.0058172                                            |
| <b>D1</b>                  | 97.0027                        | 0.004253                                      | 0.0058384                                            |
| <b>D2</b>                  | 24.9503                        | 0.010996                                      | 0.0044716                                            |
| <b>GPI</b>                 | 222.0355                       | 0.0022048                                     | 0.0059299                                            |
| <b>GPe</b>                 | 202.0382                       | 0.0042228                                     | 0.0027718                                            |
| <b>STN</b>                 | 255.7239                       | 0.011212                                      | 0.0041919                                            |
