# Supplementary material for: Criticality supports cross-frequency cortical-thalamic information transfer during conscious states
Source: eLife journal article supplement (doi:10.7554/elife.86547), 2023-12-15
Supplement: supp [file elife-86547-supp-v1.zip]

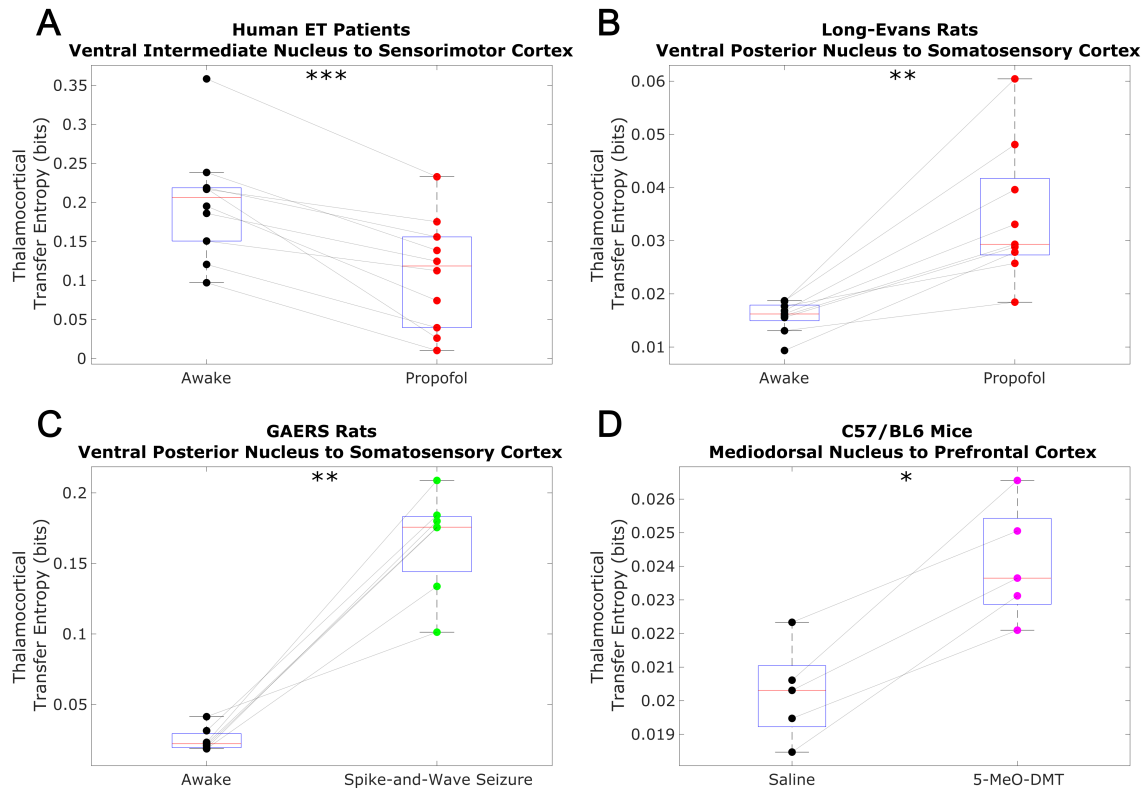

Fig. 5-figure supplement 1: We here plot changes to (non-spectrally resolved) transfer entropy from thalamus to cortex across brain states. We again found no consistent relationship between thalamocortical transfer entropy and consciousness. \* $p < 0.05$ , \*\* $p < 0.01$ , \*\*\* $p < 0.001$ , significance assessed using a one-tailed Wilcoxon signed-rank test.
